# Supplementary material for: Reduced graphene oxide supported highly porous V2O5 spheres as a high-power cathode material for lithium ion batteries
Source: Royal Society of Chemistry journal article supplement (doi:10.1039/c1nr10879d), 2011-01-01
Supplement: c1nr10879d.pdf [file c1nr10879d.pdf]

Supporting information for

## Reduced Graphene Oxide Supported Highly Porous V<sub>2</sub>O<sub>5</sub> Spheres as a High-Power Cathode Material for Lithium Ion Batteries

Xianhong Rui,<sup>ab</sup> Jixin Zhu,<sup>a</sup> Daohao Sim,<sup>a</sup> Chen Xu,<sup>a</sup> Yi Zeng,<sup>a</sup> Huey Hoon Hng,<sup>a</sup>  
Tuti Mariana Lim,<sup>\*bc</sup> and Qingyu Yan<sup>\*ade</sup>

<sup>a</sup>*School of Materials Science and Engineering, Nanyang Technological University, 639798, Singapore*

<sup>b</sup>*School of Civil and Environmental Engineering, Nanyang Technological University, 639798, Singapore*

<sup>c</sup>*School of Life Sciences and Chemical Technology, Ngee Ann Polytechnic, 599489, Singapore*

<sup>d</sup>*Energy Research Institute, Nanyang Technological University, 637459, Singapore*

<sup>e</sup>*TUM CREATE Centre for Electromobility, Nanyang Technological University, 637459, Singapore*

---

\* **Corresponding author.** Tel: +65 6790 4583, Fax: +65 6790 9081

**E-mail addresses:** [Alexyan@ntu.edu.sg](mailto:Alexyan@ntu.edu.sg) (Qingyu Yan), [tlim@ntu.edu.sg](mailto:tlim@ntu.edu.sg) (Tuti Mariana Lim)

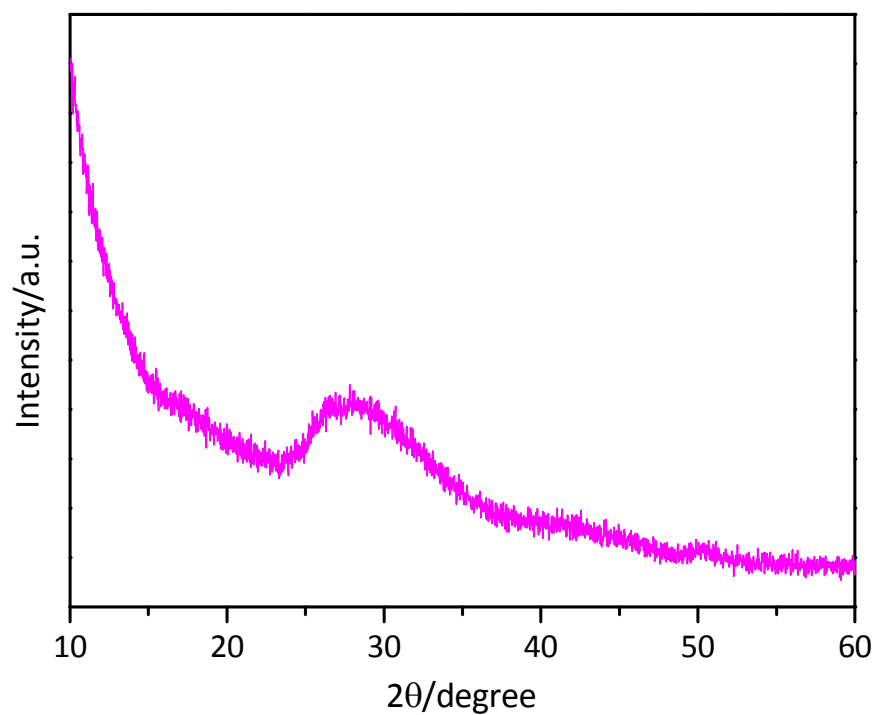

**Figure S1.** XRD pattern of the rVO sample prepared without GO in the solvothermal process. A broad hump at  $2\theta$  of about  $30^\circ$  is attributed to the signal from the sample holder.

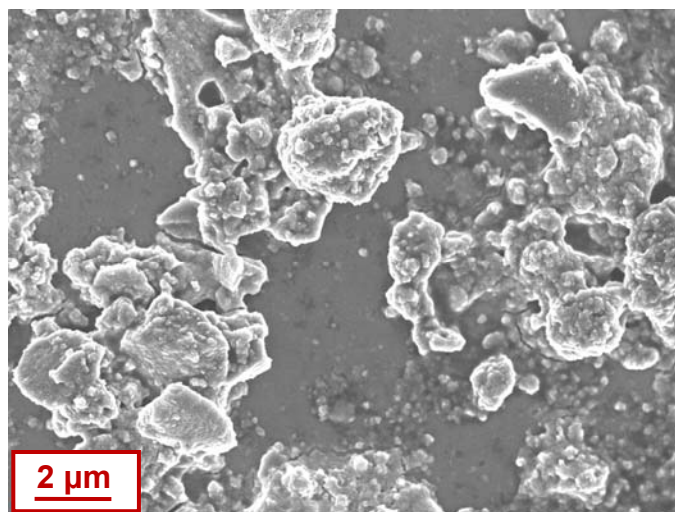

**Figure S2.** FESEM image of the rVO sample prepared in the absence of GO.

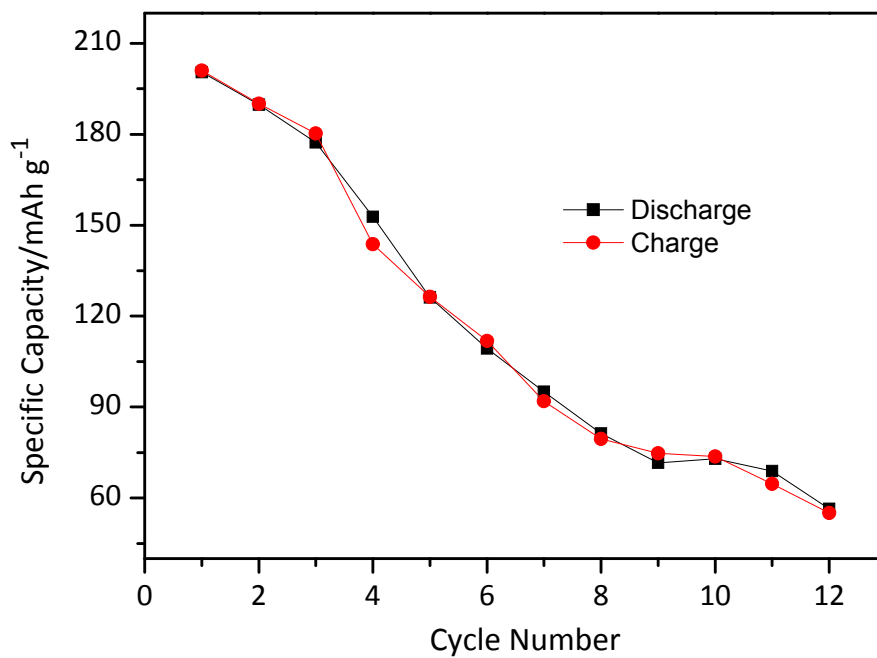

**Figure S3.** Cycling performance of the mixture of GO (46 wt%) and ~100 nm V<sub>2</sub>O<sub>5</sub> spheres at a current density of 90 mA g<sup>-1</sup>.
